# Supplementary material
Source: publisher figshare collection journal article supplement (https://acs.figshare.com/ndownloader/files/17357921)
Supplement: Supplementary file 1 [file 17357921]

# Supporting Information

## Degradation Mechanism of Conversion-Type Iron Trifluoride: Toward Improvement of Cycle Performance

Hiroshi Senoh,<sup>\*,†</sup> Keitaro Matsui,<sup>†</sup> Masahiro Shikano,<sup>\*,†</sup> Toyoki Okumura,<sup>†</sup> Hisao Kiuchi,<sup>‡</sup> Keiji Shimoda,<sup>‡</sup> Keisuke Yamanaka,<sup>§</sup> Toshiaki Ohta,<sup>§</sup> Toshiharu Fukunaga,<sup>‡</sup> Hikari Sakaebe<sup>†</sup> and Eiichiro Matsubara<sup>‡</sup>

<sup>†</sup> Research Institute of Electrochemical Energy (RIECEN), National Institute of Advanced Industrial Science and Technology (AIST), 1-8-31 Midorigaoka, Ikeda, Osaka 563-8577, Japan.

<sup>‡</sup> Office of Society-Academia Collaboration for Innovation, Center for Advanced Science & Innovation, Kyoto University, Gokasho, Uji, Kyoto 611-0011, Japan.

<sup>§</sup> SR Center, Ritsumeikan University, 1-1-1 Noji-Higashi, Kusatsu, Shiga 525-8577, Japan.

\*E-mail: h.senoh@aist.go.jp. Tel.: +81-72-751-8460. Fax: +81-72-751-9609 (H.S.).

\*E-mail: shikano.masahiro@aist.go.jp (M.S.).

Present Address

<sup>†</sup>Murata Manufacturing Co., Ltd., Higashikotari, Nagaokakyo-shi, Kyoto 617-8555, Japan.

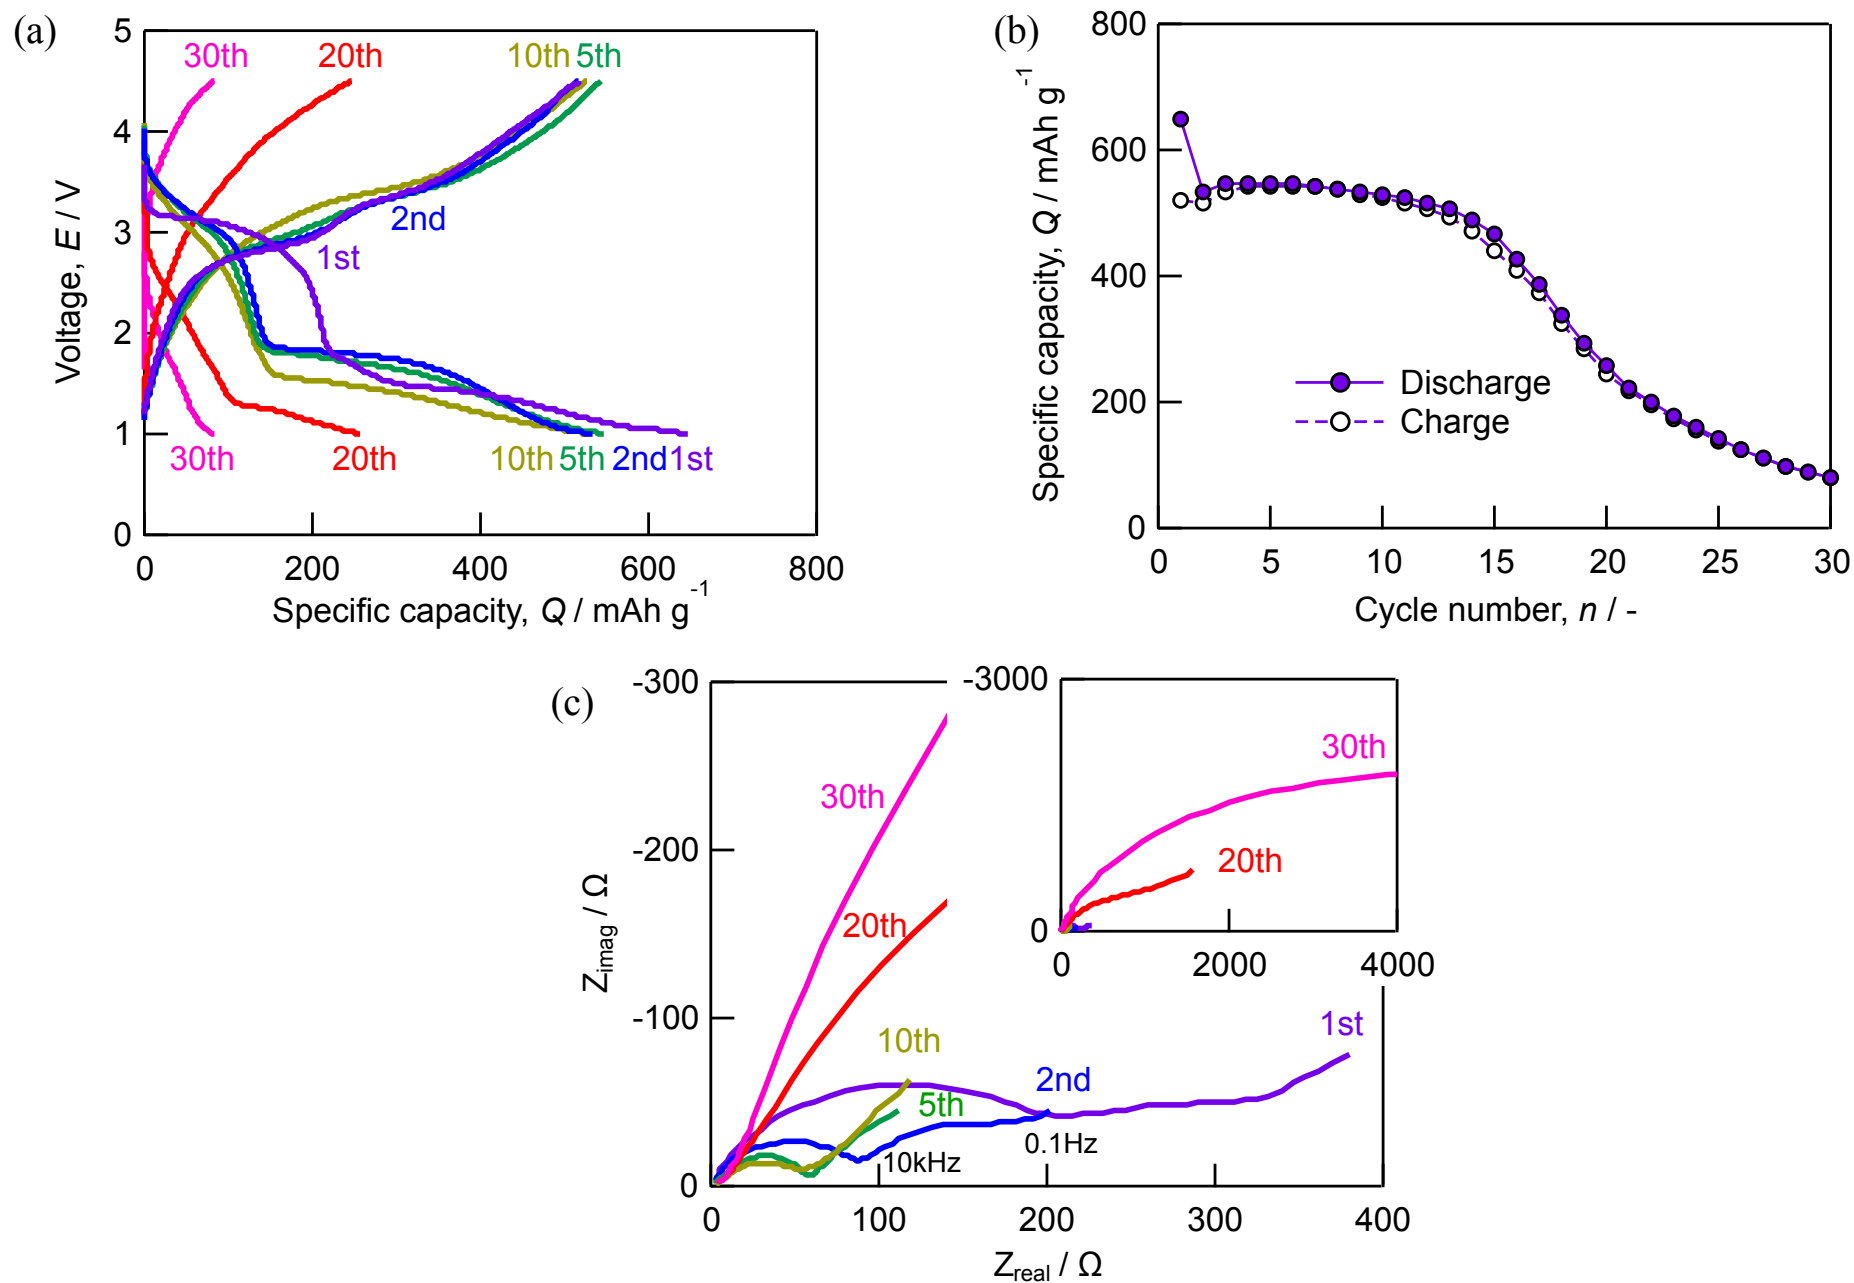

**Figure S1.** Electrochemical performance of  $\text{FeF}_3$  electrode upon cycling at 0.05 C rate. (a) Voltage-capacity profiles in electrolyte consisting of 1 M  $\text{LiPF}_6/\text{EC}:\text{DMC}$ . (b) Discharge and charge capacity plots, showing the attainable capacity decreasing drastically after 10 cycles. (c) Electrochemical impedance data at the discharge state, indicating a remarkable increase in the resistance of  $\text{FeF}_3$  electrode after 10 cycles.

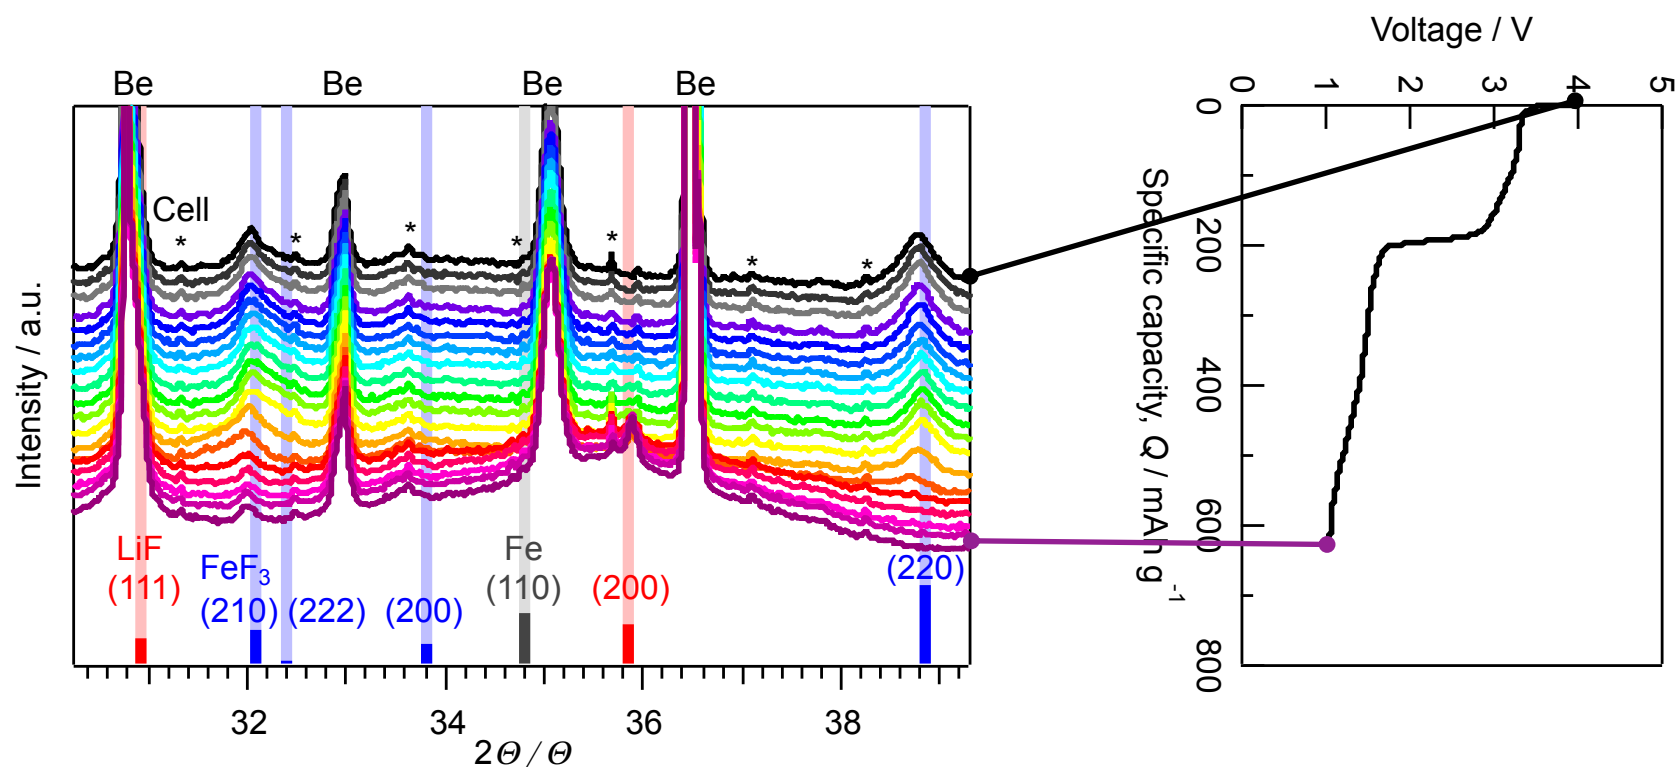

**Figure S2.** *Operando* XRD profiles of  $\text{FeF}_3$  electrode at the first discharge process and room temperature (ca. 30 °C). During the conversion reaction that takes place at the first discharge process, a broad peak for Fe is observed due to the formation of Fe nanoparticles.

|      | Discharged state |         | Charged state  |         |
|------|------------------|---------|----------------|---------|
|      | Li composition   | OCV / V | Li composition | OCV / V |
| 1st  | 2.7              | 2.00    | 0.5            | 3.64    |
| 2nd  | 2.8              | 1.57    | 0.6            | 3.71    |
| 5th  | 3.0              | 1.73    | 0.7            | 3.44    |
| 10th | 3.0              | 1.72    | 0.8            | 3.18    |
| 20th | 2.4              | 1.82    | 1.4            | 3.17    |
| 30th | 1.8              | 2.13    | 1.5            | 3.12    |

**Table S1.** Nominal Li composition estimated from the discharged/charged capacities and open circuit voltages (OCVs) after discharge/charge cycles. Nominal Li composition for 1st charged state is different from that for 30th state.

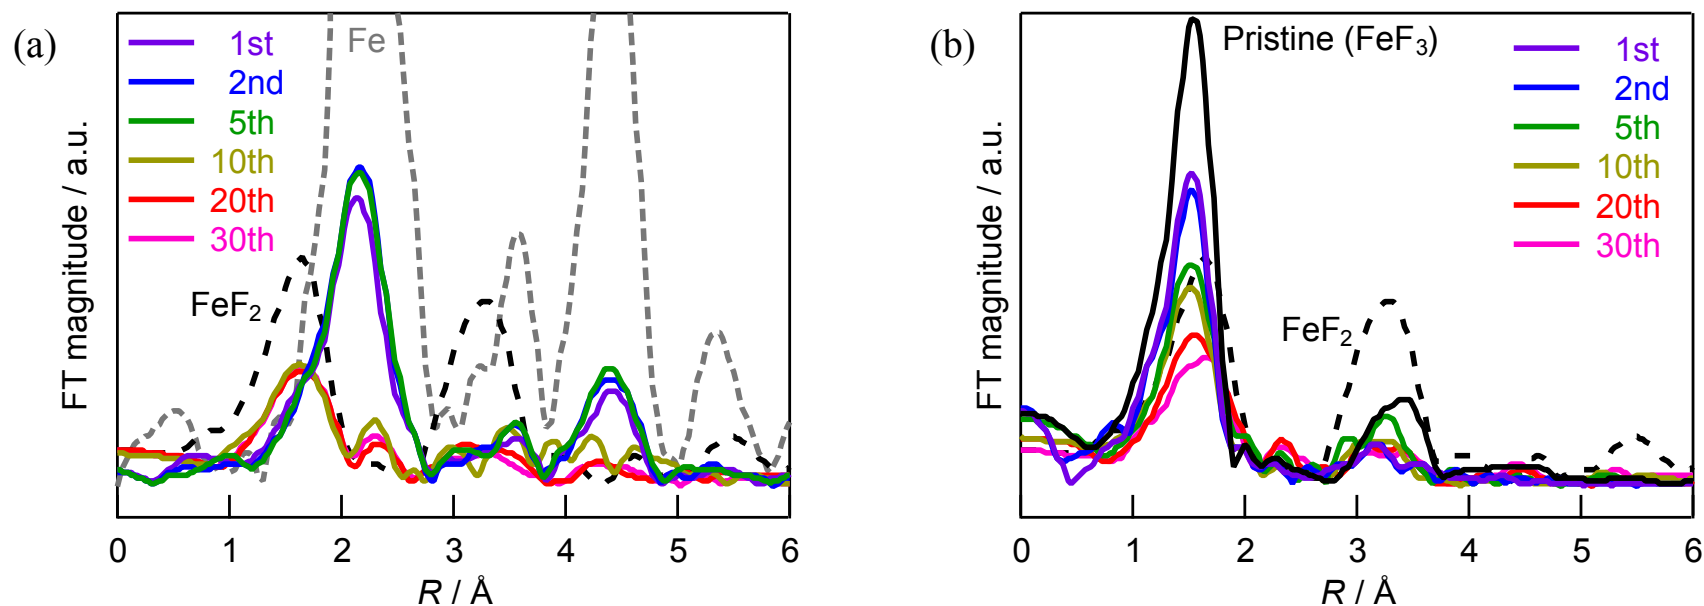

**Figure S3.** Fe *K*-edge EXAFS spectra of FeF<sub>3</sub> electrode at (a) initial and subsequent discharge process. The formation of Fe<sup>0</sup> is suppressed after 10 cycles. (b) Fe *K*-edge EXAFS spectra at the charged state on subsequent cycling, showing the oxidation state at the charged state of FeF<sub>3</sub> electrode decreasing steadily from Fe<sup>3+</sup> to Fe<sup>2+</sup>.

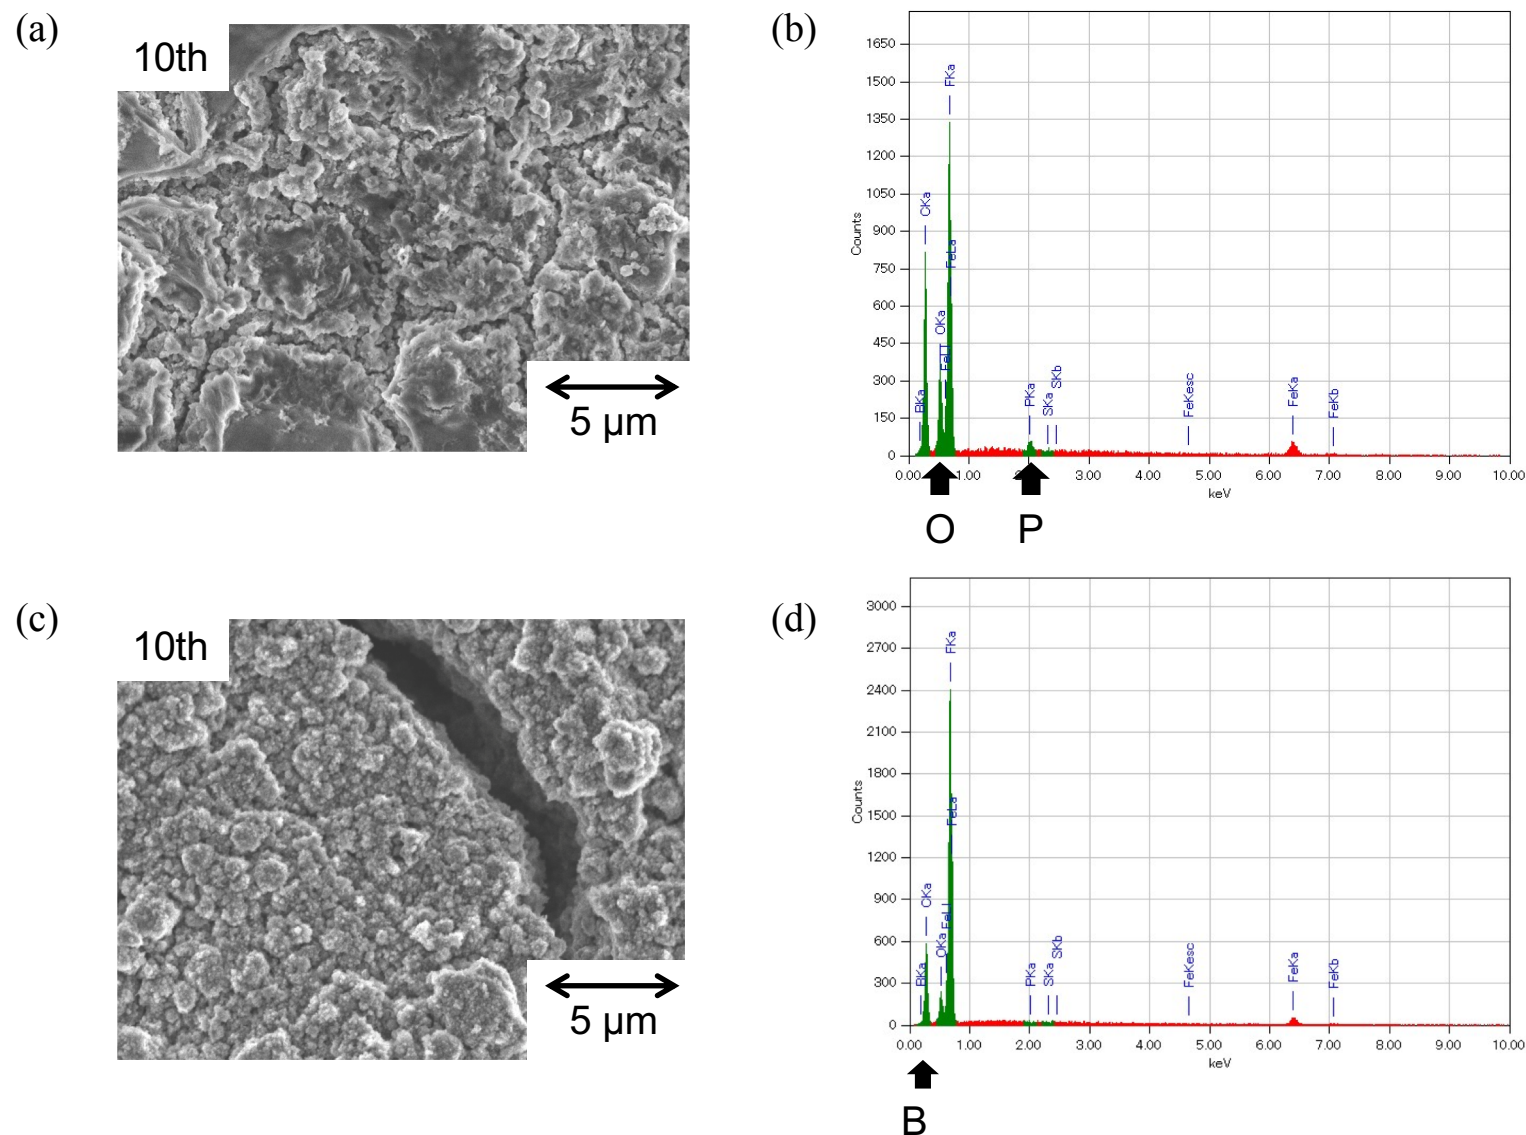

**Figure S4.** (a) SEM images and (b) EDX profile of FeF<sub>3</sub> electrode surface after 10 cycles in electrolyte containing 1 M LiPF<sub>6</sub>/EC:DMC. A thick film containing phosphorus and oxygen can be found on the electrode surface after 10 cycles. (c) SEM images and (d) EDX profile of FeF<sub>3</sub> electrode surface after 10 cycles in electrolyte comprising 1 M LiBF<sub>4</sub>/EC:DMC. Boron was scarcely observed on the electrode surface.

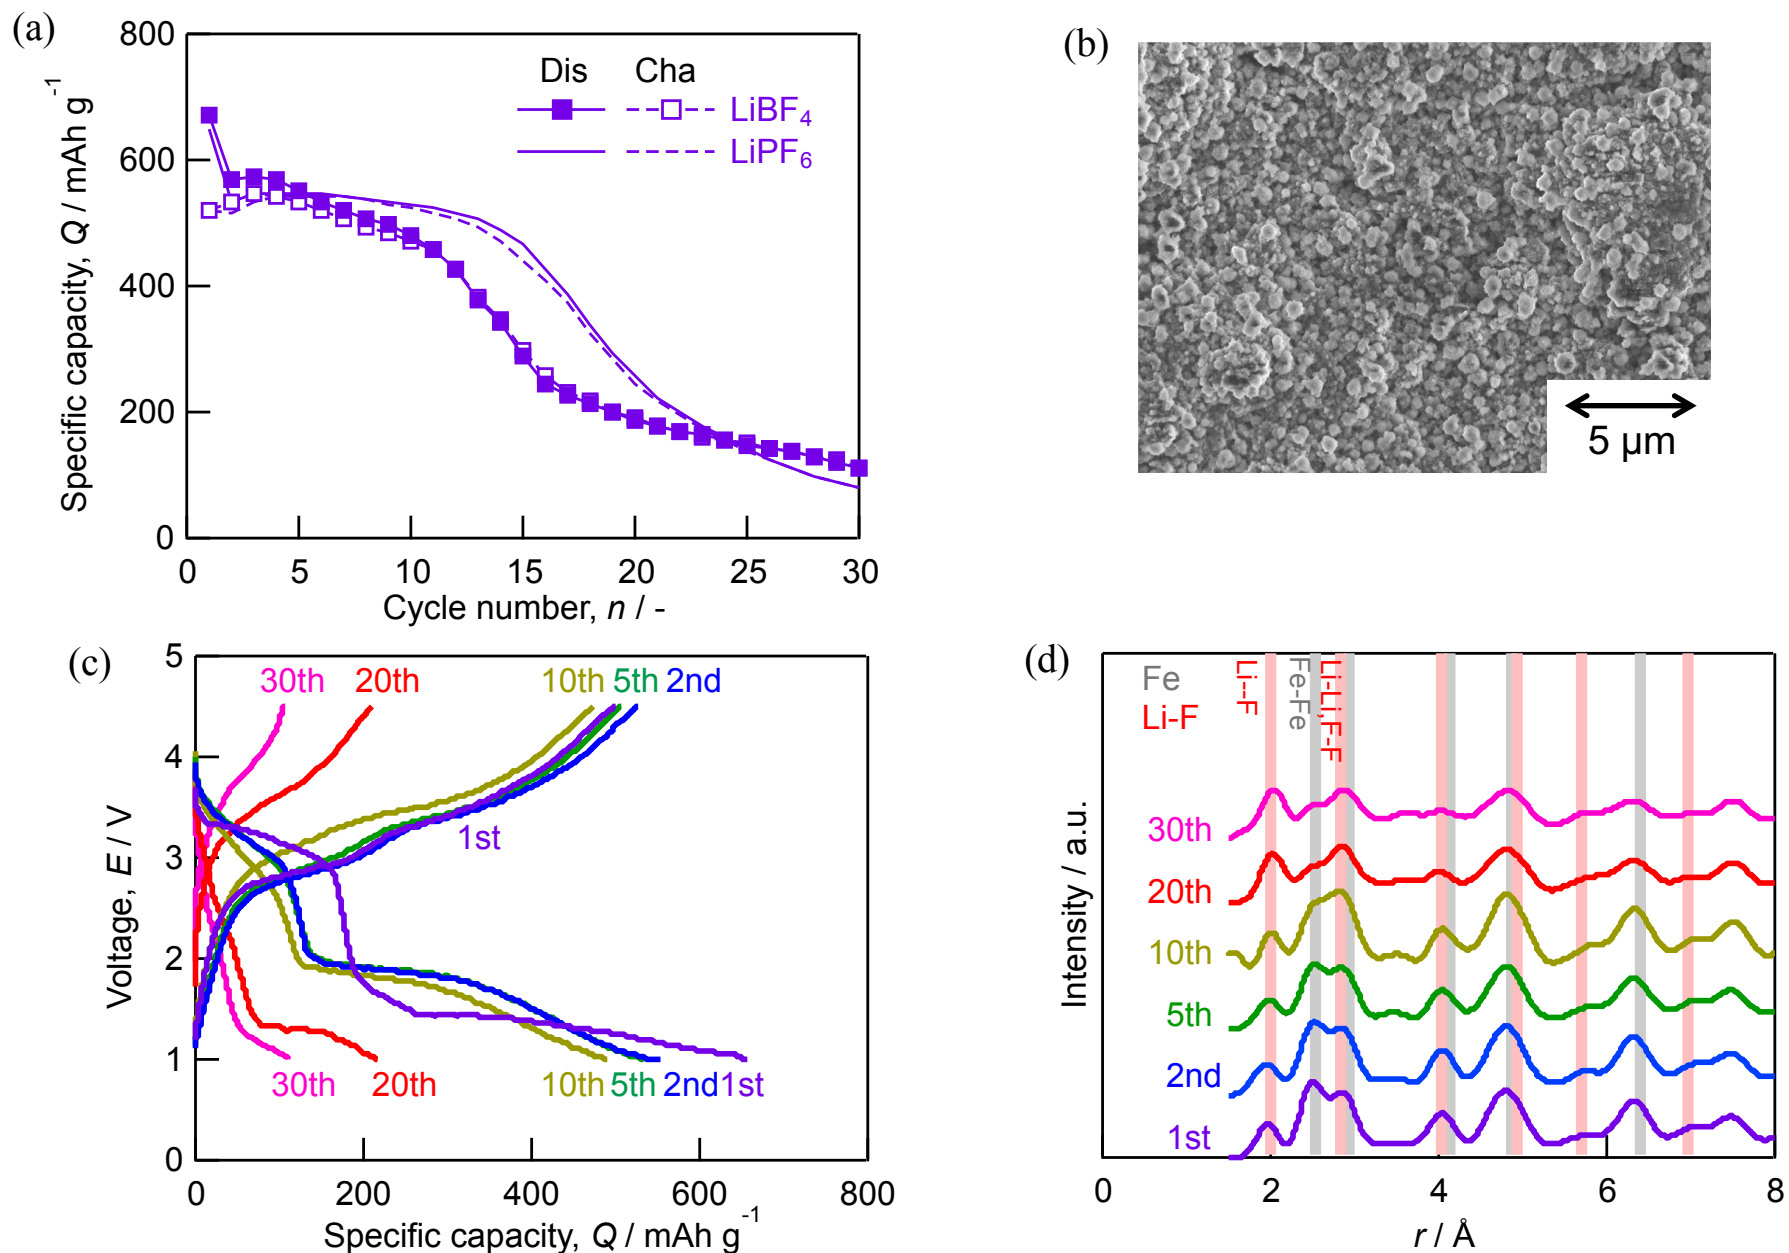

**Figure S5.** Electrochemical performance and surface morphological analyses of  $\text{FeF}_3$  electrode upon cycling at 0.05 C in 1 M  $\text{LiBF}_4/\text{EC}:\text{DMC}$ . (a) Discharge (Dis) and charge (Cha) capacities attained on subsequent cycling. The replacement of  $\text{LiPF}_6$  with  $\text{LiBF}_4$  leads to higher attainable capacities beyond 25 cycles. (b) SEM image of the electrode surface after 30 cycles.  $\text{FeF}_3$  composite particles are apparent. (c) Voltage-capacity profiles of  $\text{FeF}_3$ . (d) PDF spectra of  $\text{FeF}_3$  at the charged state. The peaks of Fe-Fe bonds still remain even after 10 cycles.

(a)

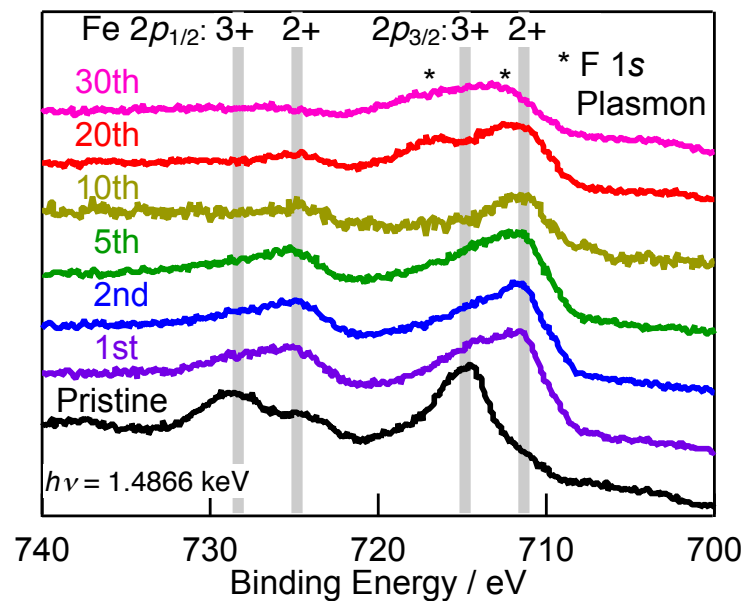

(b)

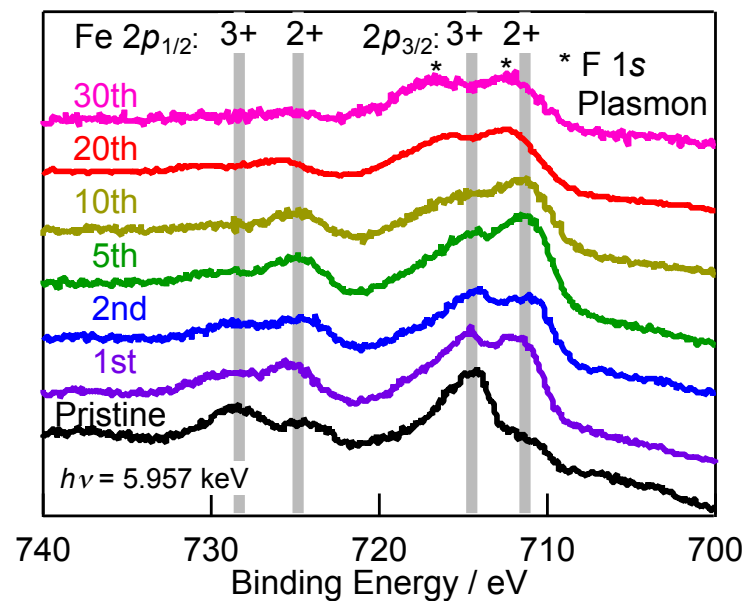

**Figure S6.** (a) XPS spectra and (b) HAXPES spectra of  $\text{FeF}_3$  electrode at the charge state.  $\text{FeF}_3$  was cycled in 1 M  $\text{LiPF}_6/\text{EC}:\text{DMC}$ . The  $\text{Fe } 2p_{1/2}$  peaks around 725-728 eV decreased significantly as the number of cycles increases, which suggests the formation of a thick film on the electrode. The peaks around 712-716 eV after 20 and 30 cycles are mainly composed of the F 1s plasmon loss peaks.



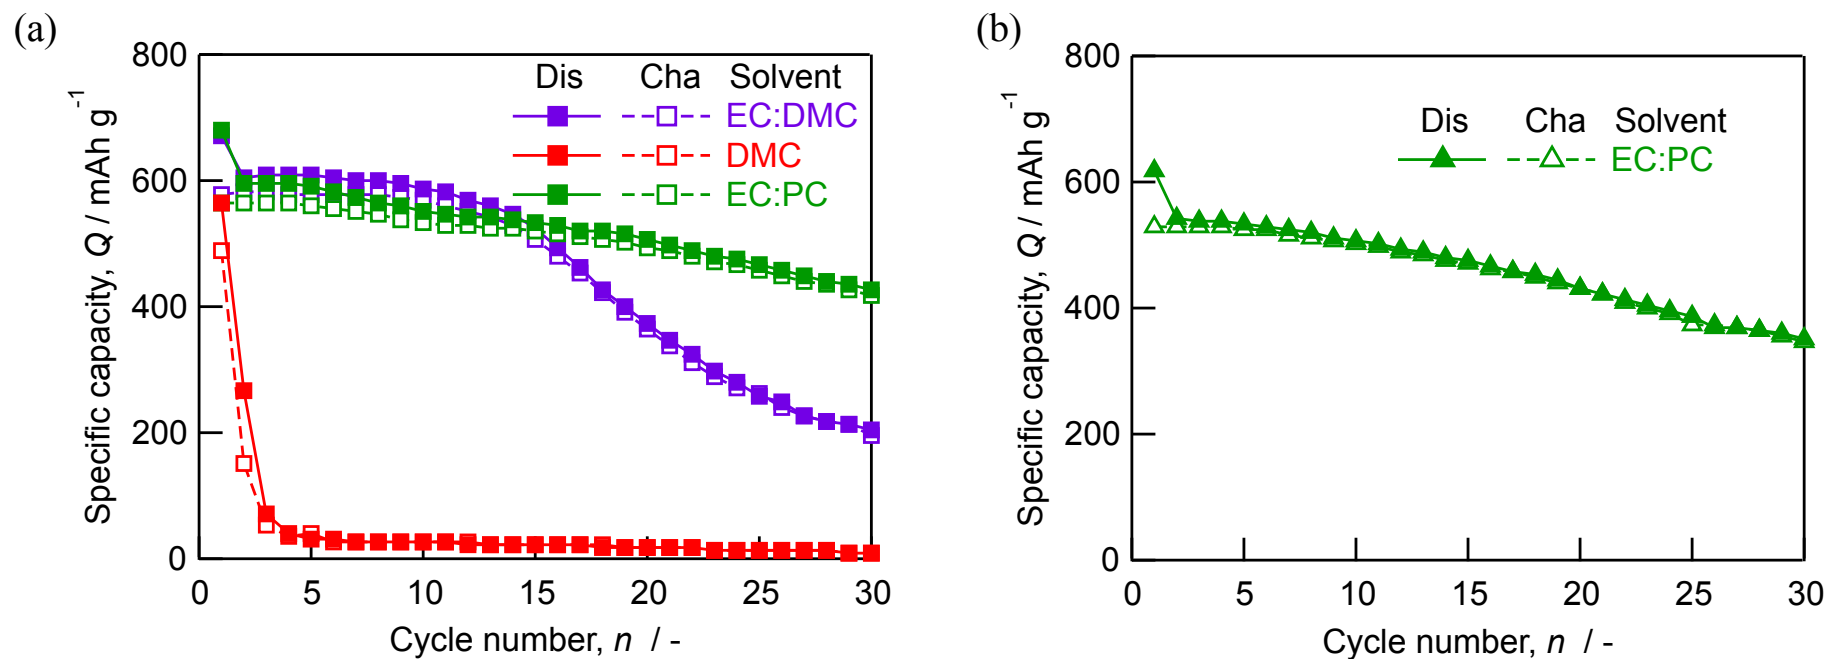

**Figure S7.** Attained (dis)charge capacities of  $\text{FeF}_3$  electrode upon successive cycling at 0.1 C rate (a) in 1 M  $\text{LiBF}_4$  with various solvents and (b) in 1 M  $\text{LiClO}_4/\text{EC:PC}$ . These data show that the selection of solvent, rather than solute, is crucial to improve the cycle performance of  $\text{FeF}_3$  electrode.

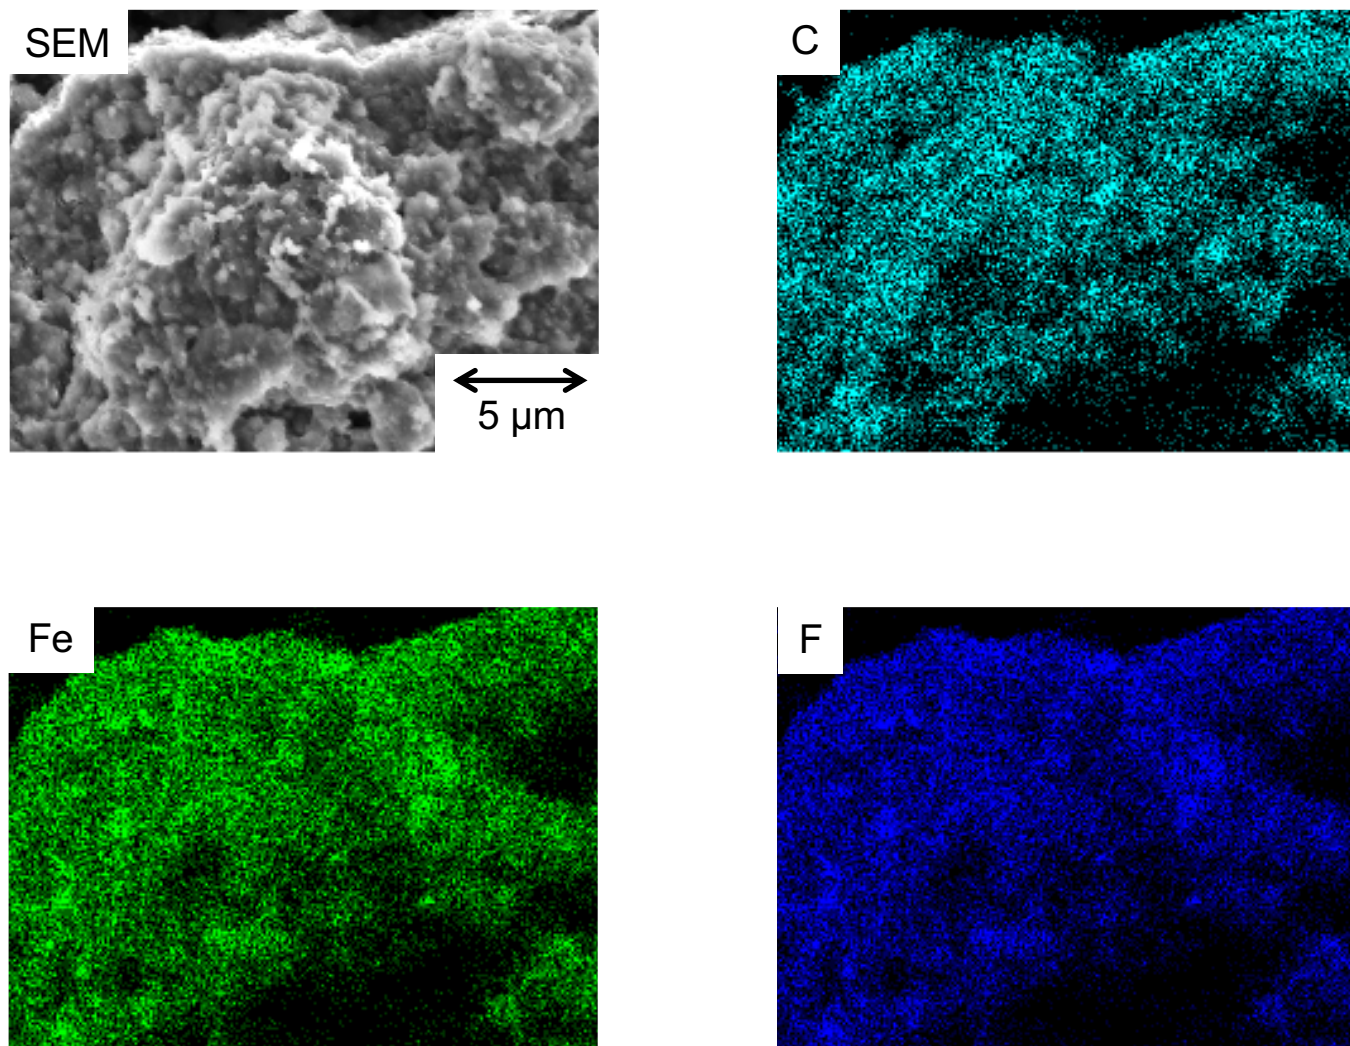

**Figure S8.** SEM image and EDX mappings of  $\text{FeF}_3$  electrode after 30 cycles in 1 M  $\text{LiClO}_4/\text{EC:PC}$  at 0.1 C rate. These data show that the particles of  $\text{FeF}_3$ /carbon powder can be clearly observed after 30 cycles.
